# Supplementary material for: Single-molecule sequencing detection of N6-methyladenine in microbial reference materials
Source: PubMed Central journal article supplement (PMC6362088; doi:10.1038/s41467-019-08289-9), 2019-02-04
Supplement: 41467_2019_8289_MOESM1_ESM.pdf [file 41467_2019_8289_MOESM1_ESM.pdf]

# Supplementary Information

Single-molecule sequencing detection of *N*6-methyladenine in microbial reference materials

McIntyre et al.



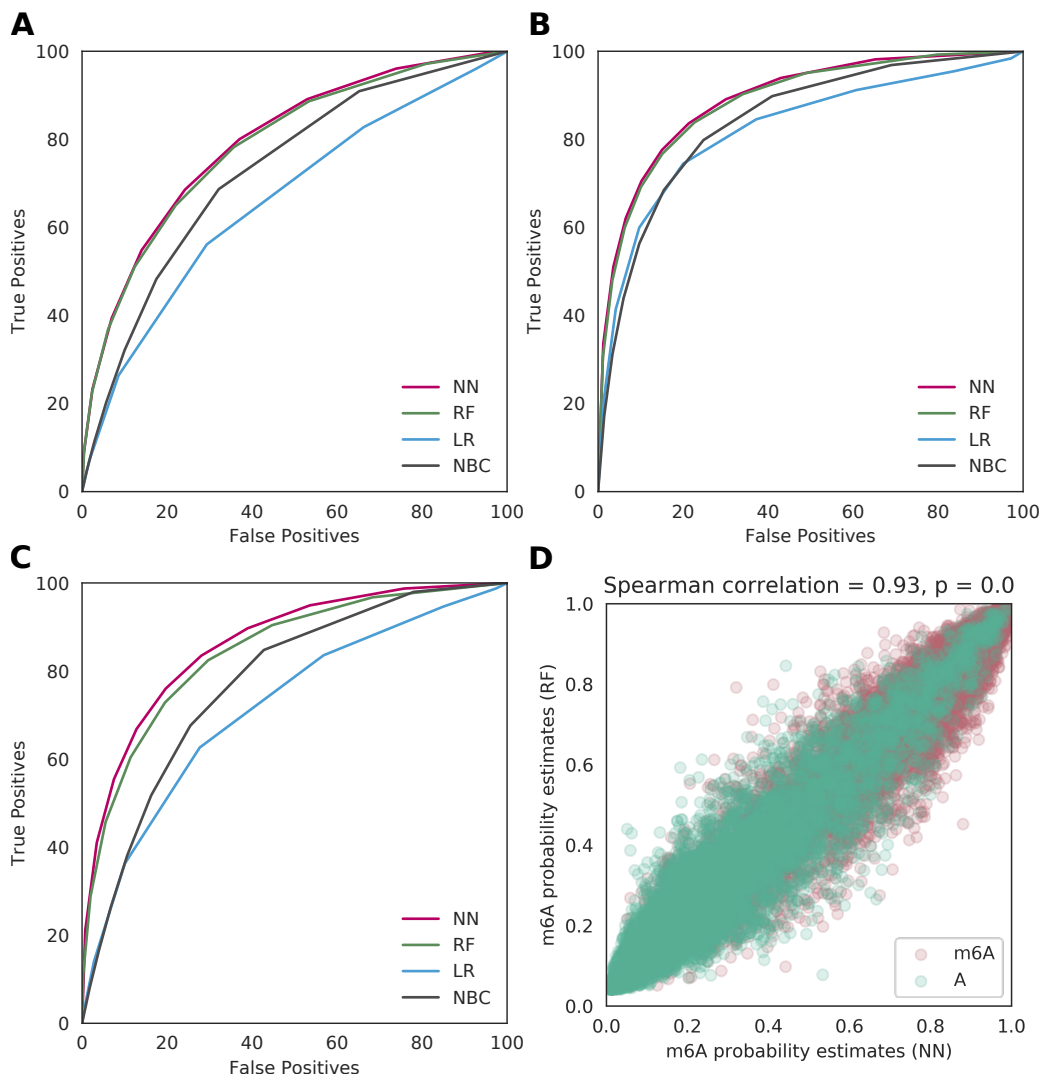

**Supplementary Figure 2. Model performance with different numbers of features.** ROC plots for a support multi-layer perceptron neural network (NN), random forest classifier (RF), linear regression classifier (LR), and naïve Bayes classifier (NBC) using (A) 7-mer, (B) 11-mer, and (C) 15-mer contexts to classify. (D) A comparison of the probability scores for 10,000 randomly selected classifications per base using the top (x-axis, neural network) and second place (x-axis, random forest classifier) algorithms for 11-mer contexts. Models were generated using one R9 experiment and tested on data from a second.

| # Features | Classifier | Accuracy | AUC   |
|------------|------------|----------|-------|
| 4          | NN         | 72.2     | 0.798 |
| 4          | RF         | 71.5     | 0.792 |
| 4          | LR         | 63.4     | 0.671 |
| 4          | NBC        | 65.4     | 0.739 |
| 6          | NN         | 81.3     | 0.895 |
| 6          | RF         | 80.8     | 0.890 |
| 6          | LR         | 77.2     | 0.828 |
| 6          | NBC        | 76.5     | 0.848 |
| 8          | NN         | 78.2     | 0.865 |
| 8          | RF         | 76.7     | 0.848 |
| 8          | LR         | 67.5     | 0.726 |
| 8          | NBC        | 67.7     | 0.782 |
| 6          | NN_sk      | 77.8     | 0.862 |
| 6          | NN_hq_sk   | 81.8     | 0.897 |
| 6          | NN_hq      | 84.2     | 0.920 |
| 6          | NN_pos     | 95.4     | 0.992 |

**Supplementary Table 1. Model performance with different features and read qualities.** Accuracy and area under the curve (AUC) for methods and parameters tested (number of features and filters) in Figure 2C and Supplementary Figure 2. Methods include neural network (NN), random forest (RF), linear regression (LR), and naïve Bayes classifier (NBC), and filters allowing up to two skips (sk), only high-quality reads (hq) of QV>9, and positions (pos) covered by 15 or more reads.

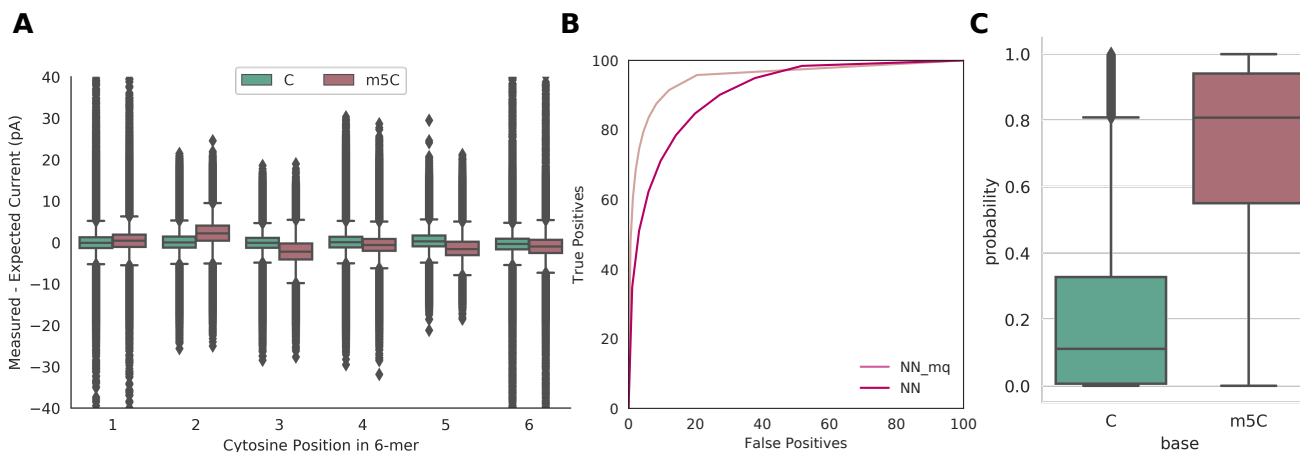

**Supplementary Figure 3. Cytosine methylation detection. (A)** Deviations between measured and expected current values across different positions in a 6-mer, depending on cytosine methylation status (outliers are truncated at +/- 40 pA). The variances for both methylated and unmethylated cytosines are higher than for m6A, likely in part because the reads were of lower average quality (5.64 for the M.Sssl dataset and 6.41 for the PCR dataset, vs. 7.65 for the Chiu dataset and 7.32 for the Mason dataset). **(B)** A ROC plot shows m5C classifications with per-read accuracy of 82.2%, increasing to 87.1% for “medium quality” data (“mq”, > mean base quality score of 7), similar to m6A despite including more sites with multiple methylated bases. **(C)** Probability scores for the detection of m5C using the same neural network classifier trained and tested using any quality reads from M. Sssl-modified data and whole genome amplified data. Boxplot centre lines show medians and whiskers 1.5x interquartile range.

| Species<br>(# putative m6A<br>MTase genes) | Motif           | Mean IPD Ratio | Total sites in<br>genome | Detected in 2nd<br>PacBio run? | PacBio +<br>MeDIP-seq | PacBio + ONT | Sites detected<br>by PB + ONT +<br>MeDIP-seq | Sites missed<br>by all methods |
|--------------------------------------------|-----------------|----------------|--------------------------|--------------------------------|-----------------------|--------------|----------------------------------------------|--------------------------------|
| <i>B. subtilis</i> (2)                     | CNCANNNNNNRTGT  | 5.96           | 535                      | yes                            | 516                   | 291          | 288                                          | 3                              |
|                                            | ACAYNNNNNNNTGNG | 5.76           | 535                      | yes                            | 516                   | 496          | 482                                          | 3                              |
| <i>E. coli</i> (4)                         | none            | 2.01           | 6296                     |                                | 547                   | 974          | 93                                           |                                |
|                                            | AAGANNNNNCTC    | 5.39           | 337                      | no data                        | 153                   | 191          | 97                                           | 0                              |
|                                            | GAGNNNNNTCTT    | 6.03           | 337                      | no data                        | 155                   | 270          | 129                                          | 0                              |
|                                            | GATC            | 5.67           | 39872                    | no data                        | 24529                 | 36805        | 12181                                        | 14                             |
| <i>E. faecalis</i> (4)                     | none            | 2.17           | 5054                     |                                | 1713                  | 791          | 165                                          |                                |
|                                            | CAAYNNNNNNNTYG  | 5.40           | 861                      | yes                            | 830                   | 857          | 827                                          | 0                              |
|                                            | CRAANNNNNNRTTG  | 5.17           | 861                      | yes                            | 830                   | 517          | 505                                          | 1                              |
|                                            | CTKVAG          | 2.55           | 5909                     | CTBVAG                         | 1788                  | 1167         | 576                                          | 1246                           |
|                                            | CTCCAG          | 2.80           | 478                      |                                | 205                   | 89           | 54                                           | 48                             |
| <i>L. monocytogenes</i> (2)                | none            | 1.84           | 7638                     |                                | 1540                  | 1493         | 334                                          |                                |
|                                            | GCANNNNNNTGC    | 5.92           | 906                      | yes, also<br>GCAAVDNNNTGC      | 886                   | 570          | 562                                          | 0                              |
|                                            | ANARAGTANYR     | 0.75           | 485                      | no                             | 4                     | 0            | 0                                            | 377                            |
| <i>P. aeruginosa</i> (1)                   | none            | 2.00           | 7438                     |                                | 626                   | 1264         | 105                                          |                                |
|                                            | none            | 2.47           | 939                      |                                | 67                    | 174          | 15                                           |                                |
| <i>S. aureus</i> (4)                       | TCTANNNNNNTTAA  | 6.74           | 425                      | yes                            | 408                   | 267          | 259                                          | 3                              |
|                                            | TTAANNNNNNTAGA  | 6.37           | 425                      | yes                            | 408                   | 3            | 3                                            | 5                              |
|                                            | GAAGNNNNNTTRG   | 6.57           | 230                      | yes                            | 197                   | 104          | 90                                           | 1                              |
|                                            | CYAANNNNNCTTC   | 5.63           | 230                      | yes                            | 199                   | 156          | 144                                          | 2                              |
|                                            | GATCGVNY        | 2.23           | 399                      | GATCBVNYD                      | 17                    | 195          | 17                                           | 11                             |
|                                            | none            | 2.03           | 4259                     |                                | 423                   | 812          | 87                                           |                                |
|                                            | none            | 2.64           | 1714                     |                                | 233                   | 183          | 28                                           |                                |
| <i>S. cerevisiae</i>                       | none            | 2.64           | 1714                     |                                | 233                   | 183          | 28                                           |                                |
|                                            | GATC            | 5.85           | 37910                    | yes                            | 24007                 | 33632        | 11885                                        | 172                            |
| <i>S. enterica</i> (3)                     | CAGAG           | 6.43           | 5819                     | yes                            | 2048                  | 3053         | 1111                                         | 110                            |
|                                            | BATGCATV        | 3.81           | 730                      | BATGCAT                        | 169                   | 239          | 110                                          | 248                            |
|                                            | none            | 2.47           | 2215                     |                                | 852                   | 290          | 88                                           |                                |
|                                            | none            | 2.47           | 2215                     |                                | 852                   | 290          | 88                                           |                                |

**Supplementary Table 2. Predicted m6A motifs and non-motif sites predicted by PacBio across eight species.** A total of fourteen motifs were predicted as methylated (nineteen including methylated reverse complements). IPD = inter-pulse duration, a measure of the rate of nucleotide addition during sequencing. mCaller was used for ONT predictions.

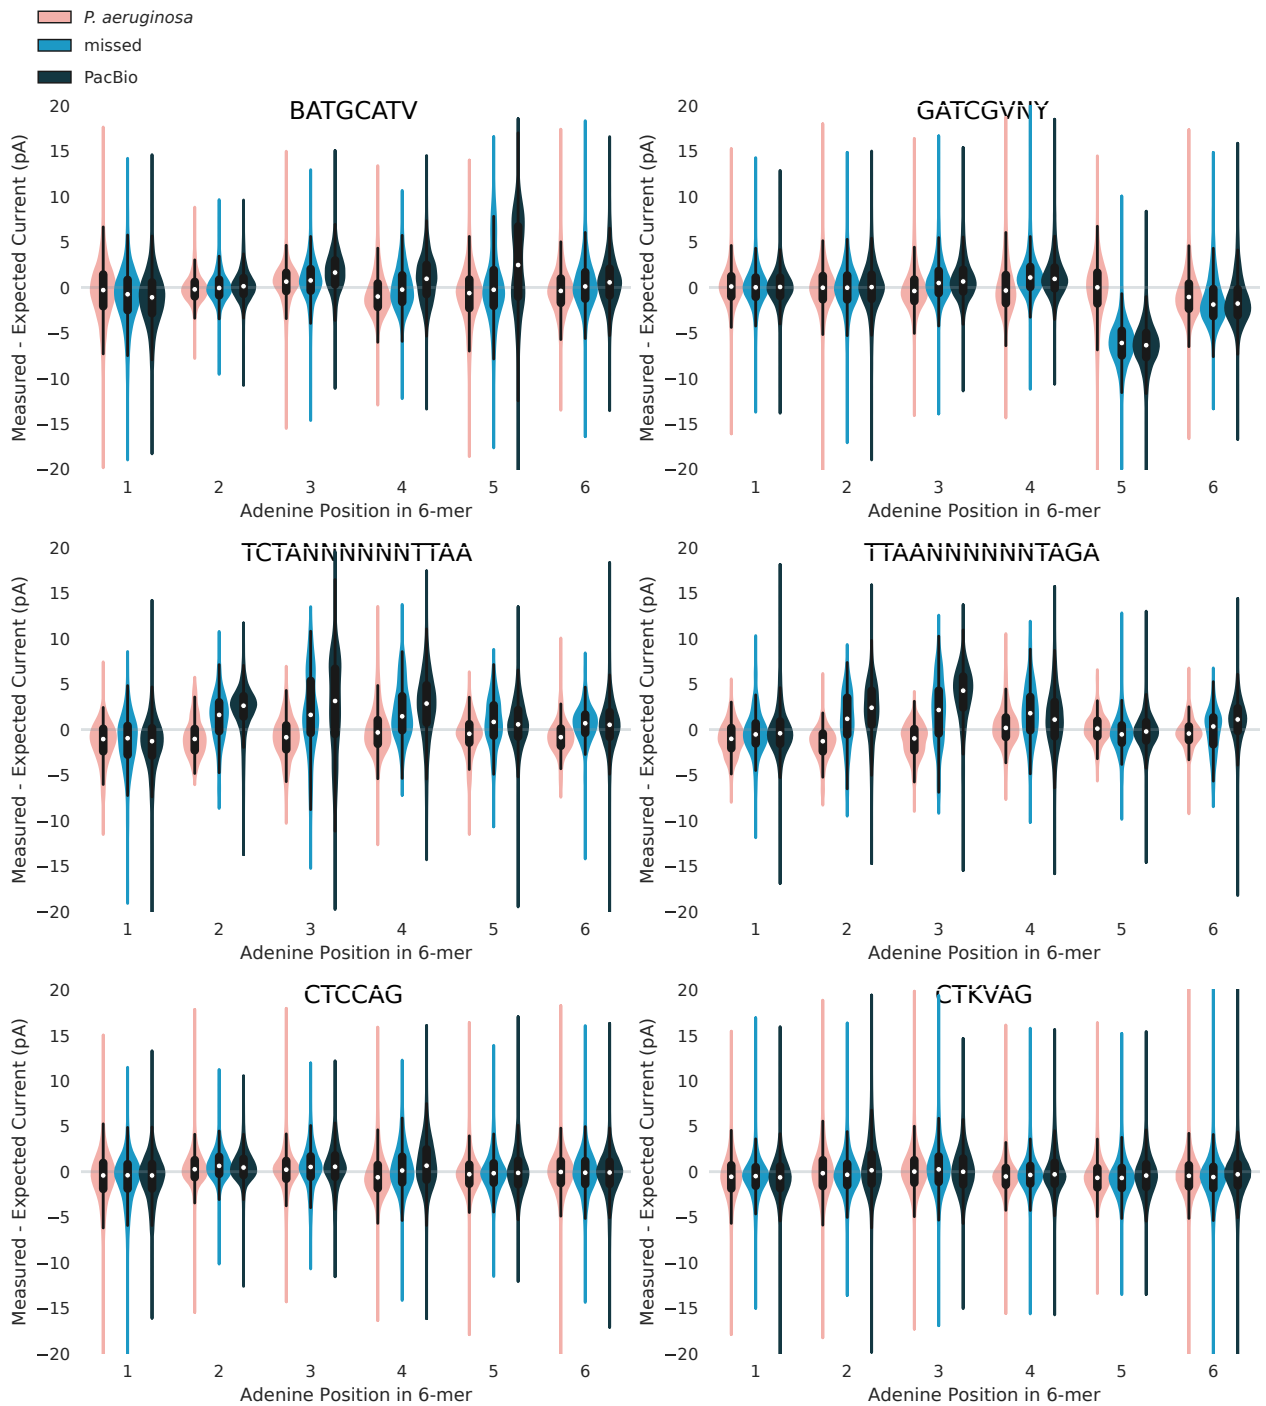

**Supplementary Figure 4. Current differences among motifs.** Plots of current differences from model values at motifs sites identified as methylated using PacBio sequencing, motif sites missed by PacBio in the same strain, and unmethylated sites for the same motif in *P. aeruginosa*. Inner boxplot centre lines show medians and whiskers 1.5x interquartile range.

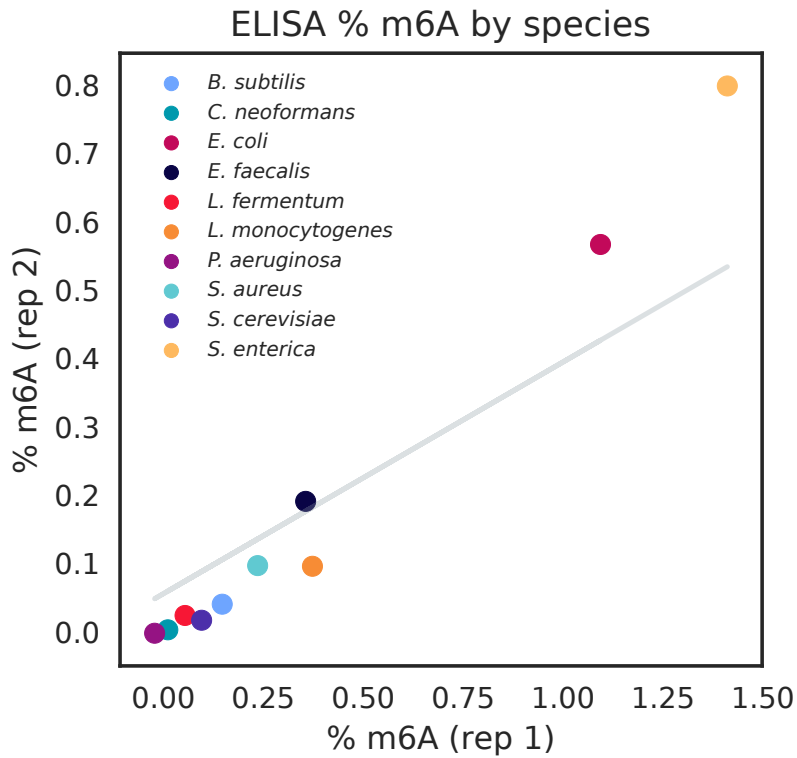

**Supplementary Figure 5. Comparison of ELISA replicates.** The percent m<sup>6</sup>A in ten reference community strains (including two for which we did not have PacBio data – *C. neoformans* and *L. fermentum*), as measured using two replicates of a commercial ELISA kit. Pearson R = 0.60, p = 0.067; Spearman  $\rho$  = 0.16, p = 0.65.

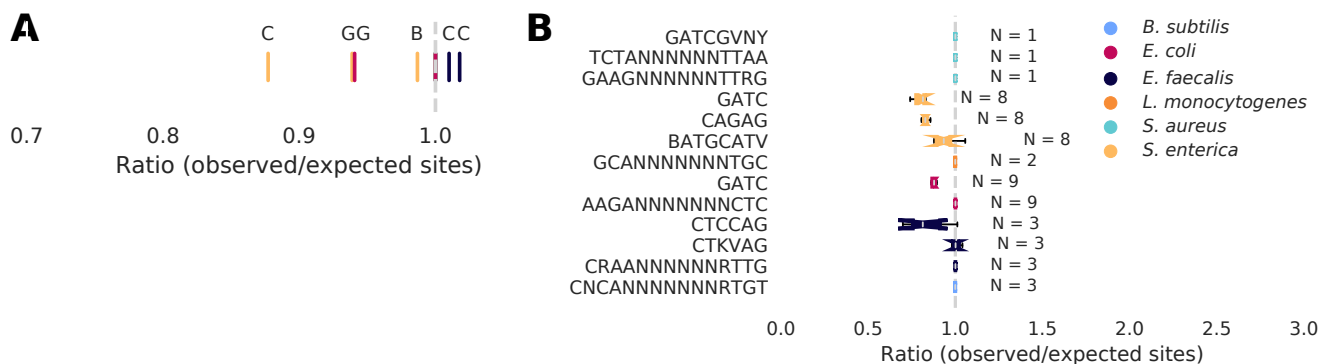

**Supplementary Figure 6. Motif depletion calculated with Kr.** Ratio of observed over expected motif counts calculated by Kr in **(A)** assembled genomes, colored by species and labeled by first nucleotide where there were multiple motifs, and **(B)** in predicted prophages within assembled genomes. Boxplots centre lines show medians, notches confidence intervals, and whiskers 1.5x interquartile range.

*Kr*, expressed in counts instead of frequencies:

$$Kr(m) = L(g)^{-1^{L(m)}} \prod_{s \in S} N(s)^{-1^{(L(m)-L(s))}}$$

where

$m$  = motif of interest

$S$  = the set of all submotifs of  $m$  (including  $m$ )

$N(s)$  = count of submotif  $s$  in the genome or sequence of interest

$g$  = genome or sequence of interest

$L(x)$  = length of  $x$



| Species                   | PacBio          |             | Illumina (WGS)       |            | Illumina (MeDIP-seq) |               | Illumina (WGBS) | ONT  |        |
|---------------------------|-----------------|-------------|----------------------|------------|----------------------|---------------|-----------------|------|--------|
|                           | FDA Site (RSII) | UF (Sequel) | FDA Site (HiSeq4000) | WCM (iSeq) | WCM (iSeq)           | WCM (NextSeq) | WCM (HiSeq)     | UCSF | WCM    |
| <i>B. subtilis</i>        | X               | X           | X                    |            | X                    |               | X               |      | X      |
| <i>E. faecalis</i>        | X               | X           | X                    |            |                      | X             | X               |      | X      |
| <i>E. coli</i>            | X               |             | X                    |            |                      | X             | X               |      | X (x2) |
| <i>L. fermentum</i>       |                 |             |                      | X          |                      | X             | X               |      | X      |
| <i>L. monocytogenes</i>   | X               | X           | X                    |            |                      | X             | X               |      | X      |
| <i>P. aeruginosa</i>      | X               |             | X                    |            |                      | X             | X               |      | X      |
| <i>S. enterica</i>        | X               | X           | X                    |            |                      | X             | X               |      | X      |
| <i>S. aureus</i>          | X               | X           | X                    |            |                      | X             | X               |      | X      |
| <i>C. neoformans</i>      |                 |             |                      | X (x2)     |                      | X             | X               |      | X      |
| <i>S. cerevisiae</i>      | X               | X           |                      | X (x2)     |                      | X             | X               |      | X      |
| NASA <i>E. coli</i> (K12) |                 |             |                      |            |                      | X             | X               | X    | X      |
| Pool                      |                 |             |                      | X          |                      |               |                 |      |        |

**Supplementary Table 3. Summary of data generated for the samples discussed in the manuscript.** The NASA *E. coli* K12 ONT sequencing included lambda phage and mouse DNA.

| Assembly, contig              | Identified match                                                                          | Pearson's r |
|-------------------------------|-------------------------------------------------------------------------------------------|-------------|
| <i>B. subtilis</i> , contig 1 | <i>B. subtilis</i> subsp. <i>spizizenii</i> W23                                           | 0.99866     |
| <i>B. subtilis</i> , contig 2 | <i>B. subtilis</i> subsp. <i>spizizenii</i> TU-B-10                                       | 0.89454     |
| <i>C. neoformans</i>          | <i>C. neoformans</i> var. <i>neoformans</i> B-3501A                                       | 0.97109     |
| <i>E. coli</i> , contig 1     | <i>E. coli</i> str. K-12 substr. MG1655                                                   | 0.99977     |
| <i>E. coli</i> , contig 2     | <i>E. coli</i> O104:H4 str. 2009EL-2050 plasmid p09EL50                                   | 0.97142     |
| <i>E. faecalis</i>            | <i>E. faecalis</i> OG1RF                                                                  | 0.99957     |
| <i>L. fermentum</i>           | <i>L. fermentum</i> F-6                                                                   | 0.99843     |
| <i>L. monocytogenes</i>       | <i>L. monocytogenes</i> SLCC2378                                                          | 0.99990     |
| <i>P. aeruginosa</i>          | <i>P. aeruginosa</i> SCV20265                                                             | 0.99990     |
| <i>S. aureus</i> , contig 1   | <i>S. aureus</i> subsp. <i>aureus</i> ECT-R 2                                             | 0.99948     |
| <i>S. aureus</i> , contig 2   | <i>S. aureus</i> subsp. <i>aureus</i> TW20 plasmid pTW20_1                                | 0.60116     |
| <i>S. cerevisiae</i>          | <i>S. cerevisiae</i> BY4742                                                               | 0.99955     |
| <i>S. enterica</i> , contig 1 | <i>S. enterica</i> subsp. <i>enterica</i> serovar Choleraesuis str. SC-B67                | 0.99974     |
| <i>S. enterica</i> , contig 2 | <i>S. enterica</i> subsp. <i>enterica</i> serovar Choleraesuis str. SC-B67 plasmid pSCV50 | 0.99122     |

**Supplementary Table 4. Similarity to published genomes.** Closely related genomes and plasmids inferred with ANI value Pearson's correlations. Note the lower Pearson's r for the *S. aureus* plasmid, which implies it is significantly different from previously known plasmids in this species.

Supplementary note: the *L. fermentum* genome was assembled using Illumina iSeq100 and nanopore data with a custom pipeline. Error corrected Nanopore and HiSeq reads were assembled using SPAdes<sup>1</sup>. Scaffolding of the assembled contigs was done using SSpace<sup>2</sup>. and gap filling was executed using GapFiller<sup>3</sup>.

| Species                 | Assembly statistics |       |            | Related strain statistics |       |            |
|-------------------------|---------------------|-------|------------|---------------------------|-------|------------|
|                         | BUSCOs, %           | GC, % | Length, bp | BUSCOs, %                 | GC, % | Length, bp |
| <i>B. subtilis</i>      | 100.0               | 44.0  | 4 090 859  | 100.0                     | 43.9  | 4 027 676  |
| <i>C. neoformans</i>    | 62.1 (58.3)         | 48.3  | 27 181 434 | 96.9                      | 45.6  | 19 699 782 |
| <i>E. coli</i>          | 98.0 (93.9)         | 50.5  | 4 895 096  | 98.7 (98.0)               | 50.7  | 4 750 926  |
| <i>E. faecalis</i>      | 97.3 (95.9)         | 37.6  | 2 865 554  | 97.3                      | 37.8  | 2 739 625  |
| <i>L. fermentum</i>     | 99.3                | 52.3  | 1 905 487  | 98.0 (97.3)               | 51.7  | 2 064 620  |
| <i>L. monocytogenes</i> | 100.0 (99.3)        | 38.0  | 3 012 754  | 100.0                     | 38.0  | 2 941 360  |
| <i>P. aeruginosa</i>    | 100.0               | 66.2  | 6 811 589  | 100.0                     | 66.3  | 6 725 183  |
| <i>S. aureus</i>        | 98.6                | 32.8  | 2 785 696  | 98.6                      | 32.9  | 2 759 125  |
| <i>S. cerevisiae</i>    | 96.2 (87.6)         | 38.1  | 12 843 354 | 99.0 (92.1)               | 38.1  | 12 147 068 |
| <i>S. enterica</i>      | 98.6                | 52.2  | 4 852 168  | 98.7 (98.0)               | 52.2  | 4 805 258  |

**Supplementary Table 5. Benchmarking Universal Single-Copy Orthologs.** Percentages of BUSCOs identified in the genomes, GC content and total assembly lengths . The primary value is the percentage of all found BUSCOs, the value in the parentheses is the percentage of contiguous single-copy BUSCOs (where absent, is equal to the primary value).

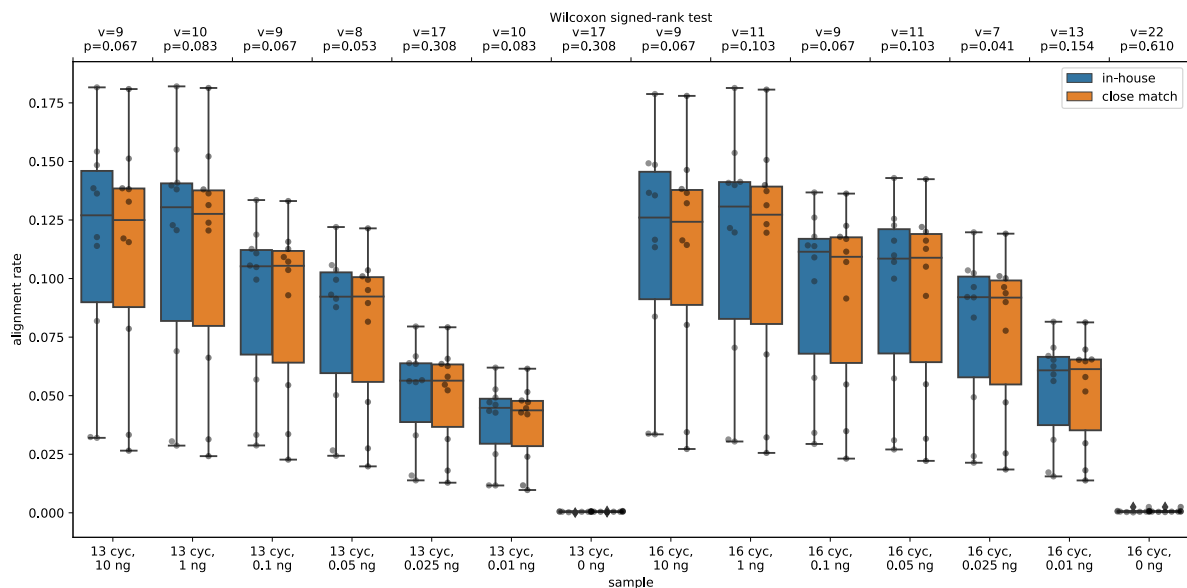

**Supplementary Figure 7. Illumina sequencing for the pooled microbial reference community aligned to assembled genomes.** Bwa mem alignment rates for microbial community data at different dilutions and PCR amplification cycles, generated using the Illumina iSeq100. Reads were aligned genomes for each of the ten strains in the reference community, using either in house assemblies or closely related strains. Alignment to in house assemblies tended to be slightly better, but not significantly so. Boxes span from the first to the third quartile, with medians denoted by a centre line, and whiskers represent the 1.5x interquartile range.

## Supplementary References

1. Bankevich, A. *et al.* SPAdes: a new genome assembly algorithm and its applications to single-cell sequencing. *Journal of computational biology* **19**, 455–477 (2012).
2. Boetzer, M., Henkel, C. V., Jansen, H. J., Butler, D. & Pirovano, W. Scaffolding pre-assembled contigs using SSPACE. *Bioinformatics* **27**, 578–579 (2010).
3. Nadalin, F., Vezzi, F. & Policriti, A. GapFiller: a de novo assembly approach to fill the gap within paired reads. *BMC bioinformatics* **13**, S8 (2012).
